# Supplementary material for: Regional infectious risk prediction of COVID-19 based on geo-spatial data
Source: PeerJ. 2020 Nov 13;8:e10139. doi: 10.7717/peerj.10139 (PMC7668208; doi:10.7717/peerj.10139)
Supplement: Supplemental Information 1 [file peerj-08-10139-s001.xlsx]

## Sheet: Sheet3
Region	Cumulative confirmed	Overseas import	Local confirmed	Epidemic rank	Rank
Hubei	68135	1	68134	17	1
Guangdong	1659	264	1395	19	2
Henan	1276	3	1273	16	3
Zhejiang	1270	51	1219	11	4
Hunan	1019	1	1018	18	5
Anhui	991	1	990	12	6
Jiangxi	932	3	929	14	7
Shandong	797	34	763	15	8
Beijing	929	174	755	1	9
Jiangsu	655	24	631	10	10
Sichuan	599	4	595	23	11
Chongqing	583	7	576	22	12
Heilongjiang	947	386	561	8	13
Shanghai	733	391	342	9	14
Hebei	349	10	339	3	15
Fujian	364	68	296	13	16
Guangxi	255	3	252	20	17
Shaanxi	322	79	243	27	18
Yunnan	188	14	174	25	19
Hainan	171	2	169	21	20
Jilin	155	5	150	7	21
Guizhou	147	1	146	24	22
Tianjin	203	66	137	2	23
Shanxi	201	67	134	4	24
Liaoning	164	33	131	6	25
Gansu	167	75	92	28	26
Xinjiang	106	14	92	31	27
Inner Mongolia	249	172	77	5	28
Ningxia	75	2	73	30	29
Qinghai	18	1	17	29	30
Tibet	1	0	1	26	31
